# Supplementary material for: Nutritional and Physicochemical Properties of Wild Lingonberry (Vaccinium vitis-idaea L.)—Effects of Geographic Origin
Source: MDPI journal article supplement (doi:10.3390/molecules28124589), 2023-06-06
Supplement: s1 [file s1]

Supplementary materials:

## Nutritional and physicochemical properties of wild lingonberry (*Vaccinium vitis-idaea* L.) – effects of geographic origin

Dalia Urbonaviciene <sup>1\*</sup>, Ramune Bobinaite <sup>1</sup>, Pranas Viskelis <sup>1</sup>, Jonas Viskelis <sup>1</sup>, Aistis Petruskevicius <sup>1</sup>, Viktorija Puzeryte <sup>1,2</sup>, Laima Cesoniene <sup>2</sup>, Remigijus Daubaras<sup>2</sup>, Linards Klavins <sup>3</sup>, Ceslovas Bobinas <sup>1</sup>

A

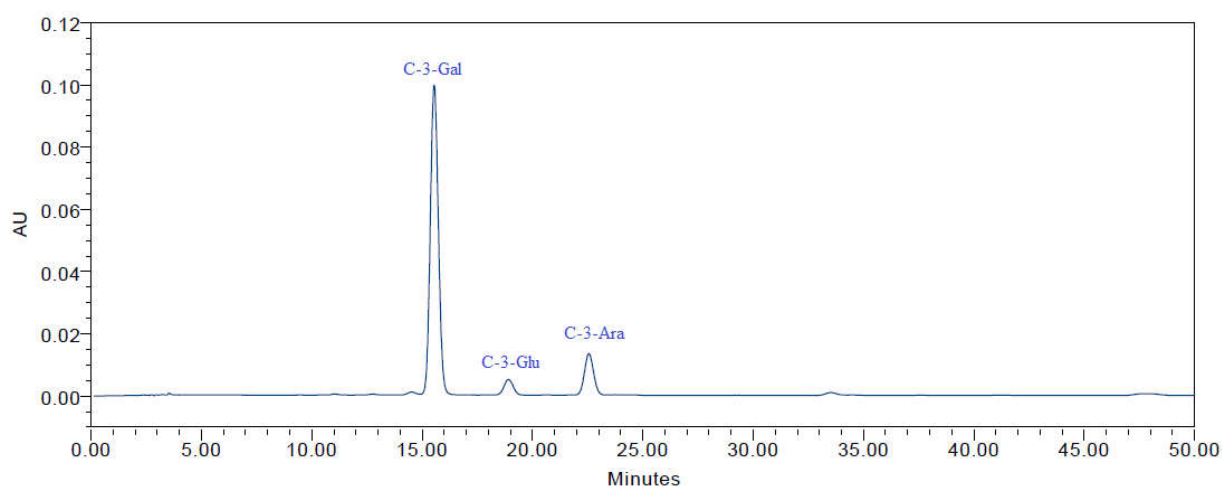

B

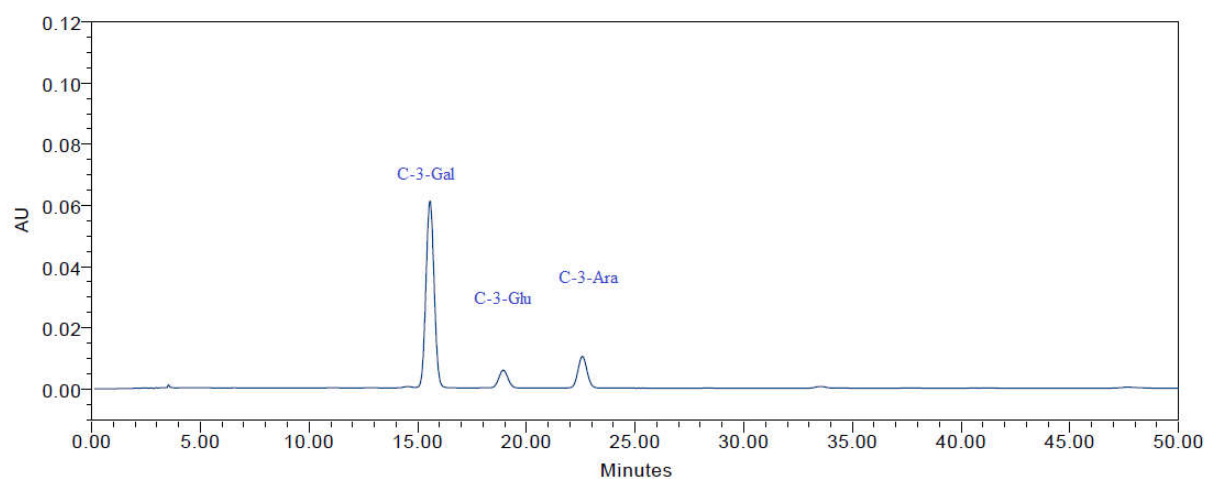

**Figure S1.** The anthocyanin profile determined by HPLC-DAD in wild *Vaccinium vitis-idaea* L. (A – NOR; B – LVA) Peaks: 1. Cyanidin-3-O-galactoside (C-3-Gal); 2. Cyanidin-3-O-glucoside (C-3-Glu); 3. Cyanidin-3-O-arabinoside (C-3-Ara).

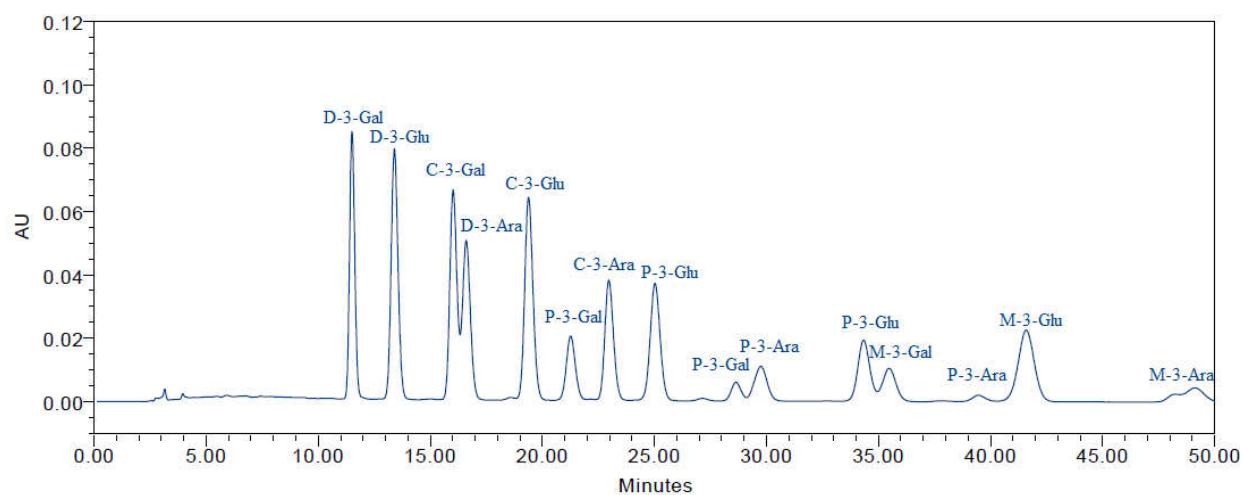

**Figure S2.** HPLC-DAD profiles of anthocyanins of European and US Pharmacopoeia Chromatography Reference Standard (CRS) Bilberry dry extract at 520 nm.

Peak identification: 1) delphinidin-3-galactoside (D-3-Gal); 2) delphinidin-3-glucoside (D-3-Glu); 3) cyanidin-3-galactoside (C-3-Gal); 4) delphinidin-3-arabinoside (D-3-Ara); 5) cyanidin-3-glucoside (C-3-Glu); 6) petunidin-3-galactoside (P-3-Gal); 7) cyanidin-3-arabinoside (C-3-Ara); 8) petunidin-3-glucoside (P-3-Glu); 9) peonidin-3-galactoside (P-3-Gal); 10) pe-tunidin-3-arabinoside (P-3-Ara); 11) peonidin-3-glucoside (P-3-Glu); 12) malvidin-3-galactoside (M-3-Gal); 13) peonidin-3-arabinoside (P-3-Ara); 14) malvidin-3-glucoside (M-3-Glu); 15) mal-vidin-3-arabinoside (M-3-Ara)

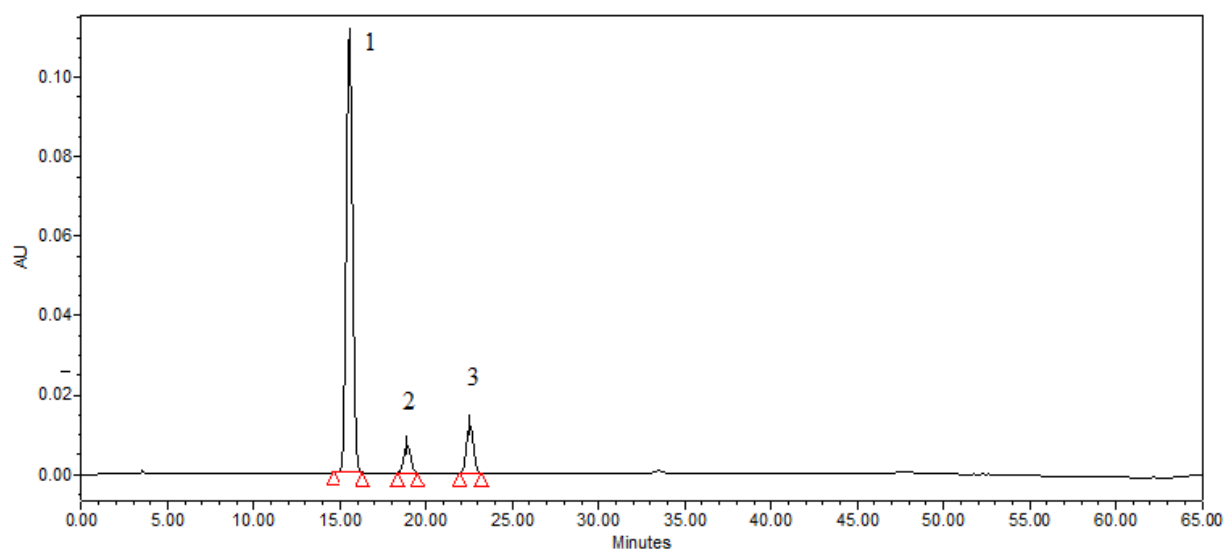

**Figure S3.** Integrated chromatogram

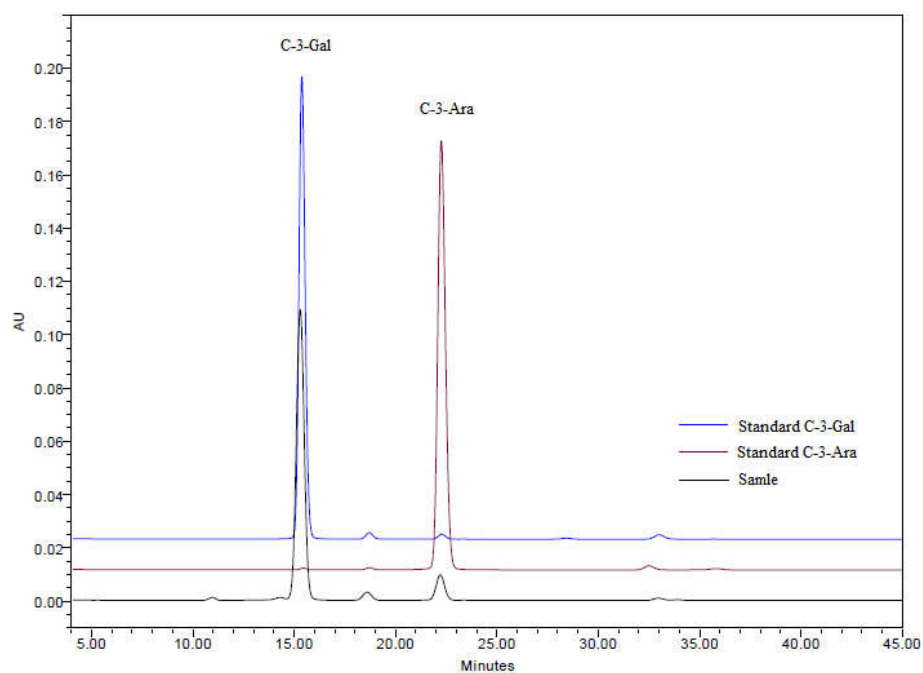

**Figure S4.** The external standards of cyaniding-3-O-galactoside (C-3-Gal), cyanidin-3-O-arabinoside (C-3-Ara) and sample of anthocyanin profile determined by HPLC-DAD in wild *Vaccinium vitis-idaea* L.

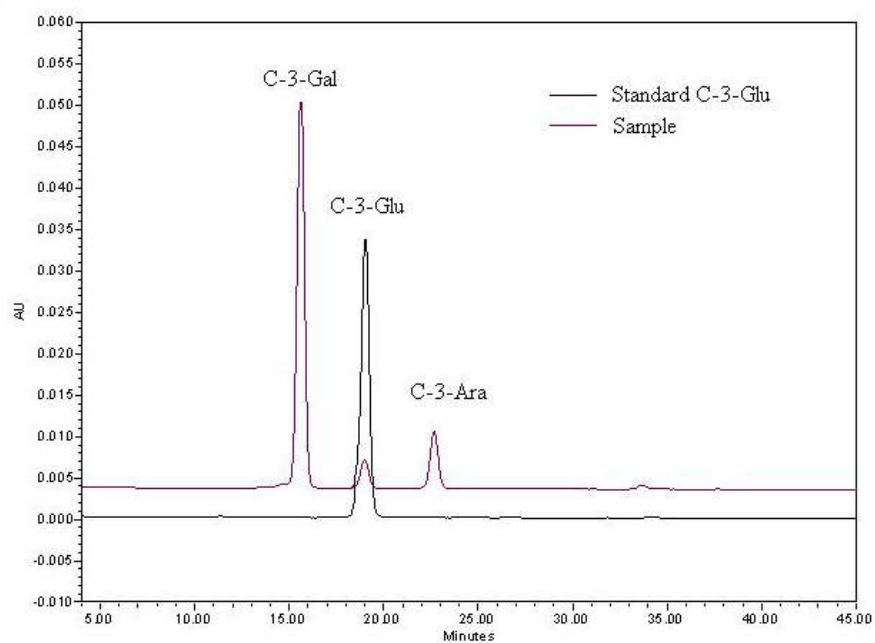

**Figure S5.** The external standard of cyanidin-3-O-glucoside (C-3-Glu) and sample of anthocyanin profile determined by HPLC-DAD in wild *Vaccinium vitis-idaea* L.
